# Supplementary material for: Morphology, size, and defect engineering in CeOHCO3 hierarchical structures for ultra-wide band microwave absorption
Source: Royal Society of Chemistry journal article supplement (doi:10.1039/d1tc04430c), 2021-11-24
Supplement: d1tc04430c1.pdf [file d1tc04430c1.pdf]

## Electronic Supplementary Information (ESI)

Morphology, size, and defect engineering in  $\text{CeOHCO}_3$  hierarchical structures for ultra-wide band microwave absorption

Haiyan Wei, Xinxin Wang, Guoxiu Tong, \* BaoXin Fan, Xiaojuan Wang and Wenhua Wu

*College of Chemistry and Life Sciences, Zhejiang Normal University, Jinhua 321004, People's Republic of China*

\*Corresponding author. *E-mail address:* tonggx@zjnu.cn (G.X. Tong).

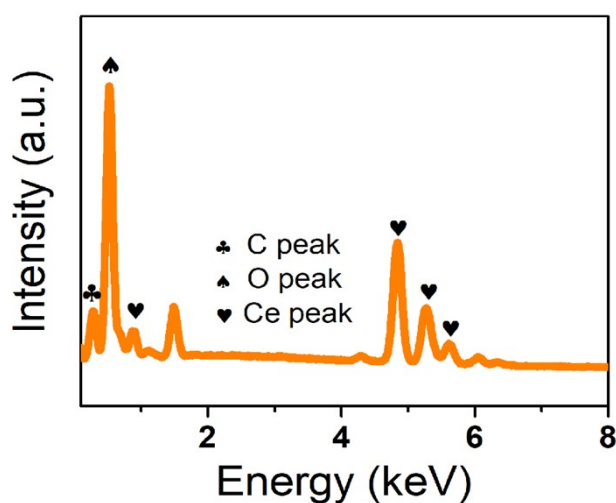

**Figure S1.** EDX spectrum of the cerium-based compounds formed under  $b = 4:1$ ,  $T = 160\text{ }^\circ\text{C}$ .

**Table S1.** Physical parameters and synthesis conditions of CeOHCO<sub>3</sub> specimens

| No. | Morphology                                     | Internal stress/% | Crystallite sizes/nm | [Ce <sup>3+</sup> ]/mmo l <sup>-1</sup> | $\beta$ | T /°C |
|-----|------------------------------------------------|-------------------|----------------------|-----------------------------------------|---------|-------|
| S0  | 2-fold butterfly-shaped hierarchical structure | 0.138             | 78.1                 | 1.800                                   | 2.5:1   | 160   |
| S1  | 2-fold butterfly-shaped hierarchical structure | 0.086             | 110.1                | 1.800                                   | 1.5:1   | 160   |
| S2  | 2-fold butterfly-shaped hierarchical structure | 0.111             | 98.3                 | 1.800                                   | 2:1     | 160   |
| S3  | 2-fold butterfly-shaped hierarchical structure | 0.140             | 62.2                 | 1.800                                   | 3:1     | 160   |
| S4  | dodecahedron                                   | 0.176             | 53.7                 | 1.800                                   | 4:1     | 160   |
| S5  | fusiform microrods                             | 0.198             | 48.1                 | 1.800                                   | 2.5:1   | 120   |
| S6  | fusiform microrods                             | 0.177             | 53.9                 | 1.800                                   | 2.5:1   | 140   |
| S7  | 2-fold butterfly-shaped hierarchical structure | 0.206             | 76.7                 | 1.800                                   | 2.5:1   | 180   |

**Table S2.** EMWAP summarization of the CeOHCO<sub>3</sub> specimens with other absorption materials [2,13,45–56].

| Absorbers                                                                                      | Filling mass fraction (%) | Optimal $R_L$ value (dB) | $f$ (GHz) (optimal $R_L$ ) | $d_w$ (mm) ( $R_L < -10$ dB) | Bandwidth (GHz) ( $R_L < -10$ dB) | Ref.      |
|------------------------------------------------------------------------------------------------|---------------------------|--------------------------|----------------------------|------------------------------|-----------------------------------|-----------|
| Core-shell structured CeO <sub>2</sub> @Fe                                                     | 80                        | -23.88                   | 9.6                        | 1.10                         | 4.24                              | [2]       |
| CeO <sub>2</sub> /MWCNT                                                                        | 70                        | -34.64                   | 16.25                      | 5                            | 2.88                              | [13]      |
| Zn modified CeO <sub>2</sub> microspheres                                                      | 70                        | -35                      | 14                         | 2                            | Approx.0.5                        | [45]      |
| CeO <sub>2</sub> -rGO                                                                          | 50                        | -45.9                    | 13.28                      | 2.0                          | 4.5                               | [46]      |
| rGO/ $\alpha$ -Fe <sub>2</sub> O <sub>3</sub> hydrogel                                         | 82                        | -33.5                    | 7.12                       | 5.0                          | 3.2                               | [47]      |
| Fe <sub>3</sub> O <sub>4</sub> nanorings                                                       | 50                        | -41.59                   | 5.84                       | 4.3                          | 2.5                               | [48]      |
| NixFe <sub>3-x</sub> O <sub>4</sub> nanospheres                                                | 60                        | -36.6                    | 14.56                      | 2.5                          | 3.4                               | [49]      |
| Spongy porous Fe <sub>3</sub> O <sub>4</sub> polyhedra                                         | 50                        | -28.2                    | 6.2                        | 4.0                          | 2.9                               | [50]      |
| RGO/Fe <sub>3</sub> O <sub>4</sub>                                                             | 50                        | -44.6                    | 6.6                        | 3.9                          | 4.3                               | [51]      |
| Fe <sub>3</sub> O <sub>4</sub> particles                                                       | 90                        | -17.8                    | 16.80                      | 1.0                          | 2.0                               | [52]      |
| Fe-C                                                                                           | 50                        | -36.0                    | 4.2                        | 3.0                          | 1.2                               | [53]      |
| Core-shell Co@CoO                                                                              | 70                        | -30.4                    | 16.1                       | 1.5                          | 4.6                               | [54]      |
| Co flower                                                                                      | 66.7                      | -25                      | 5.6                        | 2.0                          | 3                                 | [55]      |
| BaTiO <sub>3</sub>                                                                             | 70                        | -29.6                    | 12                         | 4.0                          | 0.8                               | [56]      |
| Co@N-doped carbon nanocages                                                                    | 10                        | -60.6                    | 9.8                        | 2.4                          | 5.1                               | [57]      |
| Flower-like core@shell MoSe <sub>2</sub> -based nanocomposites                                 | 40                        | -59.87                   | 11                         | 3.10                         | 6.00                              | [58]      |
| Non-magnetic bimetallic MOF-derived porous carbon-wrapped TiO <sub>2</sub> /ZrTiO <sub>4</sub> | /                         | -67.8                    | 13.0                       | 2.16                         | 5.9                               | [59]      |
| Three-dimensional flower-like ZnFe <sub>2</sub> O <sub>4</sub> @MoS <sub>2</sub>               | 20                        | -61.8                    | 9.5                        | 2                            | 5.8                               | [60]      |
| CeOHCO <sub>3</sub> S0                                                                         | 60                        | -44.44                   | 17.84                      | 2.0                          | 6.24                              | This work |
| CeOHCO <sub>3</sub> S1                                                                         | 60                        | -34.91                   | 17.04                      | 2.6                          | 6.08                              | This work |
| CeOHCO <sub>3</sub> S2                                                                         | 60                        | -44.95                   | 9.76                       | 3.4                          | 9.52                              | This work |
| CeOHCO <sub>3</sub> S3                                                                         | 60                        | -51.77                   | 9.60                       | 3.5                          | 8.56                              | This work |
| CeOHCO <sub>3</sub> S4                                                                         | 60                        | -42.71                   | 9.12                       | 2.9                          | 6.40                              | This work |
| CeOHCO <sub>3</sub> S5                                                                         | 60                        | -42.25                   | 16.32                      | 2.8                          | 7.92                              | This work |
| CeOHCO <sub>3</sub> S6                                                                         | 60                        | -47.35                   | 11.12                      | 3.0                          | 8.72                              | This work |

---

|                           |    |        |       |     |      |              |
|---------------------------|----|--------|-------|-----|------|--------------|
| CeOHCO <sub>3</sub><br>S7 | 60 | -43.12 | 17.04 | 3.4 | 8.80 | This<br>work |
|---------------------------|----|--------|-------|-----|------|--------------|

---
